# Supplementary material for: Supramolecular complexation of C60 with branched polyethylene
Source: Royal Society of Chemistry journal article supplement (doi:10.1039/d4cp00651h), 2024-01-01
Supplement: d4cp00651h1.pdf [file d4cp00651h1.pdf]

## ELECTRONIC SUPPLEMENTARY INFORMATION

# Supramolecular Complexation of C<sub>60</sub> with Branched Polyethylene

*Adam A. Pollit,<sup>a,b</sup> Garima Garg,<sup>a</sup> M. Nazir Tahir,<sup>a</sup> Audithya Nyayachavadi,<sup>a</sup> Peng Xiang,<sup>b</sup> Eric Landry,<sup>b</sup> Amer Ebied,<sup>b</sup> and Simon Rondeau-Gagné\*,<sup>a</sup>*

<sup>a</sup>Department of Chemistry and Biochemistry, University of Windsor, Essex Centre of Research (CRe), Windsor, Ontario, N9B 3P4, Canada

<sup>b</sup>PolyAnalytik Inc, 700 Collip Circle, Suite 202, London, Ontario, N6G 4X8, Canada

E-mail: srondeau@uwindsor.ca

### Table of Contents

|                                                                                                                                                    |    |
|----------------------------------------------------------------------------------------------------------------------------------------------------|----|
| General Considerations                                                                                                                             | S2 |
| Synthesis of C <sub>60</sub> +BPE complex                                                                                                          | S2 |
| <b>Figure S1.</b> Optical absorbance spectrum of BPE acquired in chloroform.                                                                       | S3 |
| <b>Figure S2.</b> Optical absorbance spectra of C <sub>60</sub> acquired in <i>o</i> -xylene, collected in 1-week intervals over a 10-week period. | S4 |
| <b>Figure S3.</b> TGA profiles of BPE (green), C <sub>60</sub> (purple), and C <sub>60</sub> +BPE (orange).                                        | S5 |

**General Considerations.** All reagents were used as received unless otherwise specified. C<sub>60</sub> was purchased from Sigma-Aldrich. BPE was purchased from PolyAnalytik Inc (London, Ontario). All other solvents were purchased from Caledon. Optical absorbance spectra were collected using a VWR UV-1600PC spectrophotometer, and processed using M.Wave software version 1.0.20. Molecular weights were determined by GPC using a Viscotek GPCmax, TDA302, and UV Detector 2600 with a TSKgel GMHHR-M column that was calibrated with narrow dispersity polystyrene standards (THF, 30°C), and processed using OmniSEC software version 4.6.2. DOSY was performed on a Bruker 300 MHz spectrometer at 298 K, and processed using MestReNova software version 14.3.1-31739. FTIR spectroscopy was performed on a Bruker ALPHA FTIR spectrometer using a Platinum ATR sampling module. Confocal Raman spectroscopy was carried out using a WiTec Raman system equipped with a 532 nm laser source processed using Project FOUR 4.0 software. Laser power was set to 1 mW at an integration time of 10 seconds per scan for a total of 10 scans per sample. TGA was performed on a TA Instruments TGA5500. Nitrogen (99.999%) was used to purge the systems at a flow rate of 60 mL/min. All samples were run in aluminum crucibles. TGA samples were held at 25°C for 30 min before heating to 600°C at a rate of 10°C/min.

**Preparation of C<sub>60</sub>+BPE complex.** To a 20 mL glass vial, 11.0 mg of C<sub>60</sub>, 110.0 mg of BPE, and 11.0 mL of chloroform were added. The mixture was sonicated for 30 minutes in a sonication bath, then left undisturbed under ambient conditions.

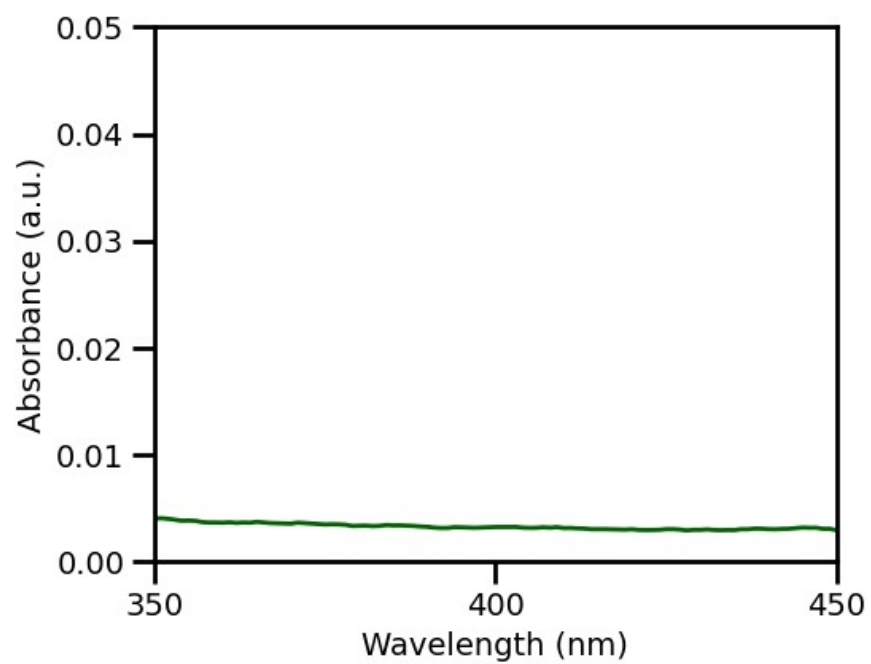

**Figure S1.** Optical absorbance spectrum of BPE acquired in chloroform.

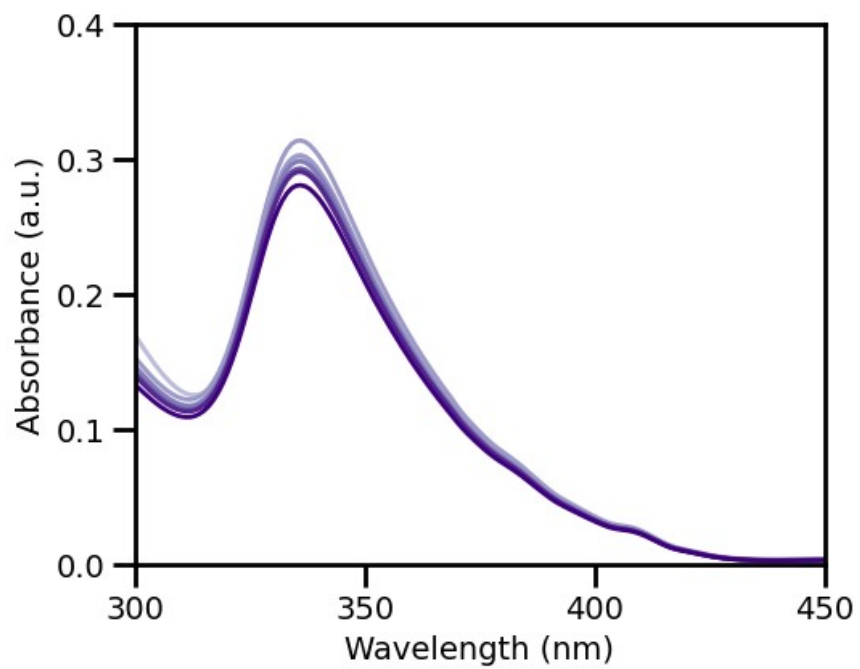

**Figure S2.** Optical absorbance spectra of C<sub>60</sub> acquired in *o*-xylene, collected in 1-week intervals over a 10-week period.

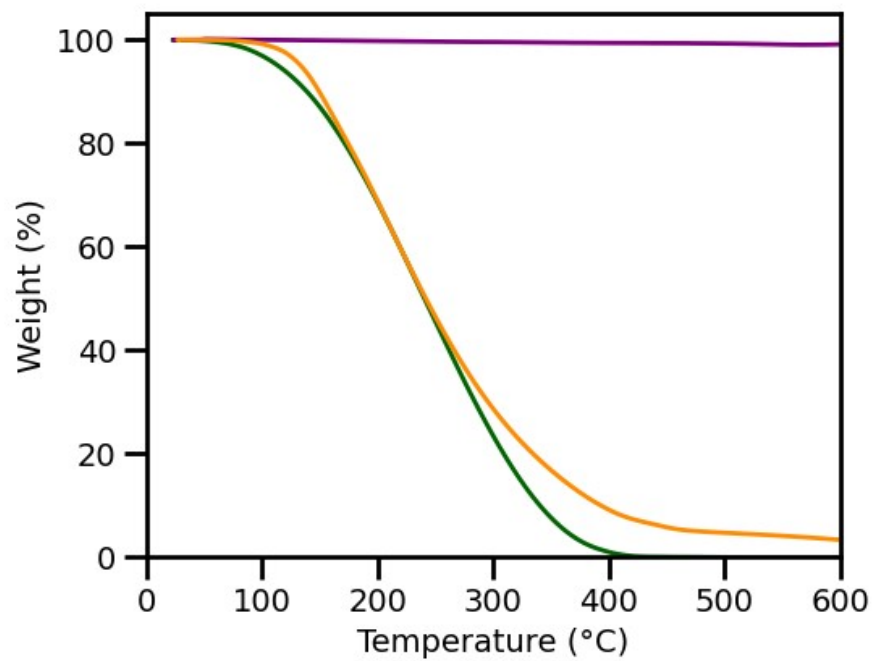

**Figure S3.** TGA profiles of BPE (green), C<sub>60</sub> (purple), and C<sub>60</sub>+BPE (orange).
